1 **Gene expression patterns associated with neurological disease in HIV infection**

2

3 **Running title:** Patterns of gene dysregulation neuroAIDS

4

5 Pietro Paolo Sanna<sup>a</sup>, Vez Repunte-Canonigo<sup>a</sup>, Eliezer Masliah<sup>b,1</sup>, Celine Lefebvre<sup>a,2</sup>

6

7 <sup>a</sup>Molecular and Cellular Neuroscience Department, The Scripps Research Institute,

8 10550 North Torrey Pines Road, La Jolla, CA 92037, USA, [psanna@scripps.edu](mailto:psanna@scripps.edu),

9 canonigo@scripps.edu; <sup>b</sup>Department of Neuroscience, University of California at San

10 Diego, 9500 Gilman Drive, La Jolla, CA 92093-0624, USA and <sup>1</sup>National Institute on

11 Aging, NIH, [eliezer.masliah@nih.gov](mailto:eliezer.masliah@nih.gov); <sup>2</sup>INSERM Unit U981, 114 rue Edouard Vaillant,

12 Gustave Roussy Institute, 94800 Villejuif, France, [celine.lefebvre@gustaveroussy.fr](mailto:celine.lefebvre@gustaveroussy.fr).

13

14 *Corresponding Author:*

15 Pietro Paolo Sanna, MD

16 The Scripps Research Institute

17 10550 North Torrey Pines Road

18 La Jolla, CA 92037-1000

19 [psanna@scripps.edu](mailto:psanna@scripps.edu)

20

21

22

23

24

25

26 .

27 **Abstract.**

28

29       To provide new insight into the pathogenesis of neurocognitive impairments (NCI)  
30 in HIV infection, we used the Gene Set Enrichment Analysis (GSEA) algorithm to  
31 analyze pathway dysregulations in gene expression profiles of HIV-infected patients  
32 with or without NCI and HIV encephalitis (HIVE). While HIVE was characterized by  
33 widespread inflammation and tissue damage, gene expression evidence of induction of  
34 interferon (IFN), cytokines and tissue injury was apparent in all brain regions studied  
35 before the emergence of NCI. Various degrees of white matter changes were present in  
36 all HIV-infected subjects and were the primary manifestation in patients with NCI in the  
37 absence of HIVE. The latter showed a distinct pattern of immune activation with  
38 induction of chemokines, cytokines,  $\beta$ -defensins, and limited IFN induction.

39       Altogether results indicate that significant neuroinflammation and neuronal suffering  
40 precede NCI. Patients with NCI without HIVE showed a predominantly white matter  
41 dysfunction with a distinct pattern of immune activation.

42 Keywords:

43

44 Neurodegeneration, pathogenesis, neuroAids, neuroinflammation.

45 Abbreviations:

46 Asymptomatic neurocognitive impairment (ANI)

47 Combination antiretroviral therapy (cART)

48 Gene Set Enrichment Analysis (GSEA)

49 HIV-associated neurological disease (HAND)

50 HIV encephalitis (HIVE)

51 Interferon (IFN)

52 NeuroAIDS Tissue Consortium (NNTC)

53 Neurocognitive impairments (NCI)

## 54 **Introduction**

55

56           While the prevalence of severe HIV-associated dementia (HAD) has decreased  
57 since the introduction of combination antiretroviral therapy (cART), milder and chronic  
58 forms of neurocognitive impairment (NCI) including asymptomatic neurocognitive  
59 impairment (ANI) and HIV-associated neurocognitive disorders (HAND) as well as HIV-  
60 associated major depressive disorder remain high (1-7). HIV encephalitis (HIVE) is  
61 considered to be the main neuropathological substrate of HAD (8-10). NCI in the setting  
62 of cART is associated with synaptodendritic degeneration (7, 11, 12). While the brain  
63 represents a sanctuary where HIV can persist due to suboptimal penetration of  
64 antiretroviral drugs (13), various studies highlighted the occurrence of NCI even in the  
65 setting of viral suppression (14, 15). Chronic neuroinflammation is believed to drive  
66 neurodegeneration in cART-era HAND (7, 9, 16, 17). However, the pathogenic  
67 mechanisms behind HAND remain unclear.

68

69           To identify gene expression correlates of neurological disease progression in  
70 HIV, we analyzed pathway dysregulations in brain regions of patients in the National  
71 NeuroAIDS Tissue Consortium (NNTC) gene expression profile dataset. The NNTC  
72 dataset consists of samples from 3 different brain regions (white matter, basal ganglia,  
73 prefrontal cortex) of control and HIV-infected patients with or without NCI and HIVE  
74 (18). For pathway analysis we used the Gene Set Enrichment Analysis (GSEA), a  
75 computational method to assess whether a priori defined sets of genes show  
76 statistically significant differences between biological states (19). GSEA was used in

- 77 conjunction with gene sets from the Molecular Signatures Database (MSigDb), including
- 78 canonical pathways in the C2 collection (20).

## 79 **Materials and Methods.**

80

81 Dataset and analysis. Clinical and demographic features of the subjects in the NNTC  
82 gene expression dataset used for the study are shown in Supplementary Table 1. Raw  
83 data were downloaded from GEO (GSE35864). We filtered out 9 samples based on  
84 quality controls (actin3/actin5 ratio, gapdh3/gapdh5 ratio, NUSE (Normalized Unscaled  
85 Standard Errors) and RLE (Relative Log Expression) computed with the packages  
86 simpleaffy and affyPLM in R). Normalization was done using gcrma (21). We further  
87 checked the expression of markers of neurons (RBFOX3) and oligodendrocytes (MBP)  
88 to validate the brain region profiled for white matter and prefrontal cortex samples and  
89 further excluded 2 samples that had conflicting expression according to their  
90 classification (D1 WM and D1 FC).

91

92 Pathway analysis. For pathway analysis, we selected one representative probe per  
93 gene based on the highest observed coefficient of variation of the probes across the  
94 samples. The dataset was interrogated for pathway enrichment using the GSEA  
95 algorithm and the canonical pathways from the MSigDB C2 collection (1,237 pathways  
96 with at least 10 genes). GSEA was run using 1,000 shuffling of the reference list.  
97 Significance was assessed using the False Discovery Rate (FDR) computed as defined  
98 in the original GSEA publication for controlling the number of false positives in each  
99 GSEA analysis (19). Differential expression was computed using a Welch t-test from the  
100 package Class Comparison in R 3.3.1. We defined the pathways commonly  
101 differentially regulated in each comparison as the pathways satisfying an FDR < 0.01 in  
102 at least 2 of the 3 brain regions for that comparison while pathways specific to one

103 region were defined as pathways satisfying  $FDR < 0.01$  in that region and  $FDR > 0.25$  in  
104 the other 2 regions.

105

106 Pathways activity: The activity of a pathway in a sample was computed the following  
107 way: we first z-transformed the gene expression profiles to normalize the expression of  
108 each gene across samples. We then computed the enrichment score (ES) of a gene set  
109 using this z-transformed matrix of expression, as described in the original description of  
110 GSEA (19). The ES corresponds to the relative activity of a gene set in a sample as  
111 compared to all others. Hence, the samples with the highest ES are the samples with  
112 the highest relative expression of the genes belonging to this set among the samples  
113 belonging to the gene expression matrix.

114

115 GSEA: Gene set enrichment analysis was implemented in R and follows the method  
116 described in (19). Null distribution was obtained by 1,000 shuffling of the reference list.  
117 Gene signatures were obtained by ranking the genes according to the sign of the  
118 statistics (S) and the p-value (p) of the test with the following metric: -  
119  $1 \times \text{sign}(S) \times \log(P, 10)$ .

## 120 **Results**

121

122 **Pathway analysis of the NNTC dataset.** The NNTC dataset was interrogated for  
123 pathway enrichment using the canonical pathways from the MSigDb C2 collection and  
124 the GSEA algorithm (19) (See methods). We compared the following four groups: A:  
125 controls; B: HIV-infected no NCI no HIVE; C: HIV-infected with NCI no HIVE; D: HIV-  
126 infected with NCI and HIVE (Fig. 1). All results are presented in supplementary tables in  
127 Supplementary Tables 2-6.

128

129 **Identification of pathways dysregulated in HIV-infected patients without NCI vs.**  
130 **uninfected controls (B-A comparison).** We identified 24 pathways concordantly  
131 differentially regulated in at least 2 brain regions in this transition (Table 1). Genes  
132 driving the enrichment (on the left of the leading edge corresponding to the peak of the  
133 running enrichment in GSEA as shown in Fig. 2A) were retrieved for each region (Fig.  
134 3). These pathways and genes indicate a significant activation of IFN and cytokine  
135 signaling prior to the onset of NCI. Both genes regulated by type I and type II IFN were  
136 activated in HIV infection without NCI (Fig. 2, 3). IFN-regulated genes, such as MCH  
137 class I genes, were induced in all brain regions of HIV-infected patients without NCI as  
138 compared to uninfected controls (Fig. 2, 3).

139

140 We then looked at pathways specifically differentially regulated in one brain region as  
141 compared to the two other regions. To this end, we selected pathways enriched at FDR  
142  $< 0.01$  in one region and FDR  $> 0.25$  in the other two. We observed 6 pathways meeting  
143 the criteria in the white matter, 4 in the prefrontal cortex and 2 in the basal ganglia.



144 Pathways enriched in the white matter in the B-A comparison are indicative of immune  
145 activation, and complement induction (e.g., BIOCARTA COMP PATHWAY, BIOCARTA  
146 CTL PATHWAY, REACTOME IMMUNOREGULATORY INTERACTIONS BETWEEN A  
147 LYMPHOID AND A NON LYMPHOID CELL). We also observed increased expression  
148 of calpain-related genes (BIOCARTA UCALPAIN PATHWAY) in the prefrontal cortex  
149 and calpain-related and caspases-related genes in the basal ganglia (KEGG  
150 APOPTOSIS) as well as evidence of activation of the apoptosis-mediating p75 receptor  
151 (PID P75 NTR PATHWAY) and TNF- $\alpha$  signaling (PID TNF PATHWAY) in both  
152 prefrontal cortex and basal ganglia, indicative of tissue damage. Downregulation of  
153 genes related to neurotransmission was also evident in the prefrontal cortex and basal  
154 ganglia of patients with HIV but no NCI (group B) compared to control subjects (e.g.,  
155 REACTOME LIGAND GATED ION CHANNEL TRANSPORT, KEGG NEUROACTIVE  
156 LIGAND RECEPTOR INTERACTION, Fig. 4), (Supplementary Table 2).

157

158 **Identification of pathways differentially regulated in HIV-infected patients with NCI**  
159 **without HIVE vs. uninfected controls (C-A comparison).**

160 HIV-infected patients with NCI and no HIVE (group C), showed significant changes  
161 specific to the white matter compared to uninfected controls. Upregulated pathways are  
162 indicative of immune activation involving chemokine, cytokines and  $\beta$ -defensins  
163 induction (e.g., REACTOME CHEMOKINE RECEPTORS BIND CHEMOKINES; KEGG  
164 CYTOKINE CYTOKINE RECEPTOR INTERACTION, REACTOME BETA DEFENSINS,  
165 KEGG AUTOIMMUNE THYROID DISEASE, KEGG ALLOGRAFT REJECTION),  
166 oxidative stress and cytochrome P450 enzymes (KEGG DRUG METABOLISM  
167 CYTOCHROME P450, REACTOME BIOLOGICAL OXIDATIONS), matrix

168 metalloproteases (MMPs) (NABA MATRISOME ASSOCIATED), and downregulation of  
169 genes related to RNA transcription and processing (e.g., REACTOME RNA POL II  
170 TRANSCRIPTION, KEGG SPLICEOSOME), (Supplementary Table 3), Fig. 5.

171

172 **Identification of pathways differentially regulated between HIV-infected patients**  
173 **with NCI and no HIVE vs. HIV-infected without NCI (C-B comparison).**

174 Two pathways were concordantly differentially regulated between groups B and C in all  
175 brain regions. These pathways are indicative of type I IFN activation in HIV-infected  
176 patients without NCI (group B), as indicated above. We also identified 47 pathways  
177 specifically differentially regulated in the prefrontal cortex. Among the pathways  
178 upregulated in group B as compared to C in the prefrontal cortex, were pathways  
179 indicative of tissue damage (e.g., REACTOME REGULATION OF APOPTOSIS), RNA  
180 transcription and processing (e.g., REACTOME METABOLISM OF RNA, KEGG  
181 RIBOSOME), and pathways related to protein degradation (e.g., KEGG  
182 PROTEASOME, REACTOME AUTODEGRADATION OF THE E3 UBIQUITIN LIGASE  
183 COP1, REACTOME APC C CDC20 MEDIATED DEGRADATION OF MITOTIC  
184 PROTEINS), (Supplementary Table 4).

185

186 **Identification of pathways differentially regulated between HIV-infected patients**  
187 **with HIVE vs. patients without NCI (D-B comparison).**

188 Pathways dysregulated in all brain regions in HIVE (group D) as compared to patients  
189 with HIV without NCI (group B) are suggestive of disruption of protein folding, a  
190 mechanism of neurodegeneration (e.g., REACTOME POST CHAPERONIN TUBULIN  
191 FOLDING PATHWAY, REACTOME PREFOLDIN MEDIATED TRANSFER OF

192 SUBSTRATE TO CCT TRIC). Other broadly dysregulated pathways in patients with  
193 HIVE (group D) as compared to patients with HIV without NCI (group B) indicate greater  
194 and broader activation of inflammatory and immune activation genes in group D as  
195 compared to group B. Genes regulated by both type I and type II IFN that were found  
196 activated in HIV infection without NCI (group B) as compared to uninfected controls,  
197 generally showed greater activation in patients with HIVE (group D). For instance,  
198 REACTOME INTERFERON GAMMA SIGNALING was increased in group D in basal  
199 ganglia in comparison to group B, and REACTOME INTERFERON ALPHA BETA  
200 SIGNALING was increased in group D in both white matter and basal ganglia in  
201 comparison to group B. All pathways specifically upregulated in basal ganglia in group  
202 D were involved in immune activation (e.g., REACTOME NUCLEAR EVENTS KINASE  
203 AND TRANSCRIPTION FACTOR ACTIVATION, REACTOME CYTOKINE SIGNALING  
204 IN IMMUNE SYSTEM, KEGG LEISHMANIA INFECTION, PID TCR PATHWAY).

205

206 Interestingly, the white matter in group D did not show any specific differentially  
207 regulated pathways in comparison to group B; conversely, the prefrontal cortex had 121  
208 pathways and basal ganglia had 16 pathways significantly activated in group D in  
209 comparison to group B. Among the pathways upregulated in the prefrontal cortex in  
210 group D were pathways indicative of production of cytokine, chemokines and  $\beta$ -  
211 defensins (e.g., KEGG CYTOKINE CYTOKINE RECEPTOR INTERACTION,  
212 REACTOME CHEMOKINE RECEPTORS BIND CHEMOKINES, REACTOME BETA  
213 DEFENSINS). Pathways indicative of neurodegeneration were differentially regulated  
214 between D and B in frontal cortex including KEGG PARKINSONS DISEASE and KEGG  
215 HUNTINGTONS DISEASE (Fig. 6). These pathways include genes indicative of trophic

216 interaction, protein misfolding and mitochondrial function. We also identified  
217 downregulated pathways related to mitochondria and energy metabolism were  
218 decreased in group D in all brain regions at FDR < 0.2 (e.g., REACTOME TCA CYCLE  
219 AND RESPIRATORY ELECTRON TRANSPORT, REACTOME PYRUVATE  
220 METABOLISM AND CITRIC ACID TCA CYCLE, REACTOME GLYCOLYSIS),  
221 (Supplementary Table 5).

222

223 **Identification of pathways differentially regulated between HIV-infected patients**  
224 **with HIVE vs. patients with NCI and no HIVE (D-C comparison).**

225 We identified 27 pathways concordantly differentially regulated at the C to D  
226 comparison. Seventeen pathways were upregulated in group D (HIVE) as compared to  
227 group C (NCI without HIVE) and largely reflected activation in HIVE of IFN response  
228 (e.g., REACTOME INTERFERON SIGNALING, REACTOME INTERFERON GAMMA  
229 SIGNALING, KEGG ANTIGEN PROCESSING AND PRESENTATION), immune  
230 activation and inflammatory cytokine signaling (e.g., REACTOME CYTOKINE  
231 SIGNALING IN IMMUNE SYSTEM, KEGG CYTOKINE CYTOKINE RECEPTOR  
232 INTERACTION, REACTOME INNATE IMMUNE SYSTEM), apoptosis (BIOCARTA  
233 DEATH PATHWAY), protein misfolding (REACTOME PREFOLDIN MEDIATED  
234 TRANSFER OF SUBSTRATE TO CCT TRIC), and HIV infection (PID HIV NEF  
235 PATHWAY, REACTOME LATE PHASE OF HIV LIFE CYCLE).

236

237 Ten pathways were downregulated in group D and included pathways related to  
238 translation and transcription, as seen in the A to B transition, likely reflecting  
239 transcriptional/translational dysregulations brought about by IFN activation (e.g.,

240 REACTOME TRANSPORT OF RIBONUCLEOPROTEINS INTO THE HOST  
241 NUCLEUS), HIV expression (REACTOME INTERACTIONS OF VPR WITH HOST  
242 CELLULAR PROTEINS, REACTOME LATE PHASE OF HIV LIFE CYCLE), impaired  
243 neuronal communication (REACTOME TRANSMISSION ACROSS CHEMICAL  
244 SYNAPSES), and energy metabolism (REACTOME CITRIC ACID CYCLE TCA  
245 CYCLE, REACTOME PYRUVATE METABOLISM AND CITRIC ACID TCA CYCLE).  
246  
247 Pathways related to neurodegenerative/neuronal pathways were differentially regulated  
248 in the prefrontal cortex and basal ganglia in patients with HIVE, including KEGG  
249 HUNTINGTONS DISEASE, KEGG PARKINSONS DISEASE, REACTOME NEURONAL  
250 SYSTEM (Fig. 6). A significant component of these pathways are genes involved in  
251 mitochondria function and energy metabolism. No pathways were specifically different  
252 in white matter between groups C and D, while 37 pathways were specific to the  
253 prefrontal cortex and 11 to basal ganglia. Several prefrontal cortex-specific pathways  
254 were downregulated in group D and included cell cycle regulation while basal ganglia  
255 pathways were related to translation/transcription and immune regulation (BIOCARTA  
256 D4GDI PATHWAY, BIOCARTA 41BB PATHWAY, PID CD8 TCR DOWNSTREAM  
257 PATHWAY, PID IL12 STAT4 PATHWAY), (Supplementary Table 6).  
258

259 **Discussion.**

260

261 While dementia and HIV encephalitis are late consequences of HIV/AIDS, HIV  
262 enters the brain early after infection and remains in the brain throughout the course of  
263 infection. A considerable body of observations indicate that neuroinflammatory markers  
264 correlate with disease progression and the emergence of NCI in neuroAIDS (22-24).  
265 Proinflammatory cytokines and chemokines including IFN- $\alpha$ , TNF- $\alpha$  and CCL2 that are  
266 secreted by astrocytes and microglia have long been implicated in the pathogenesis of  
267 neuroAIDS (25-29). For instance, IFN- $\alpha$  in the cerebrospinal fluid has been observed to  
268 be higher in HAD compared with HIV-infected patients without HAD (25, 28, 30). Here,  
269 we show that HIV infection is associated with substantial dysregulations of gene  
270 expression related to immune activation before the onset of NCI and HIVE.

271

272 A primary finding in the present study is that we observed gene expression  
273 evidence of IFN induction in patients with HIV infection without NCI (group B) as well as  
274 in patients with HIVE (group D). Induction of both IFN type I and type II responsive  
275 genes was seen in patients with HIV infection without NCI (group B) in all brain regions  
276 studied. Among the genes differentially regulated within these pathways were IFN-  
277 responsive genes such as HLA-A, -B, -C, -G, -F, adhesion molecules such as VCAM-1,  
278 and ISG15 and IFI6 (31-33).

279

280 Chronic IFN expression is considered a key contributor to inflammation in  
281 neuroAIDS as well as a potential cause of NCI and depression vulnerability. However,  
282 data on the contribution of IFN activation to NCI are conflicting. Mice with transgene

283 expression of IFN- $\alpha$  in astrocytes develop a dose-dependent inflammatory  
284 encephalopathy (34). Yet IFN- $\alpha$  transgenic expression in the central nervous system  
285 induced only mild effects in an egocentric spatial working memory test (35). However,  
286 the latter may also reflect compensatory changes as passively administered IFN- $\beta$   
287 impaired spatial memory in mice in another study (36). A recent study suggested a role  
288 for IFN- $\gamma$  in shaping fronto-cortical connections and social behavior (37), which is  
289 consistent with a potential role of excessive IFN activation in the pathogenesis of NCI.  
290 In a recent large multi-center trial, depression was not significantly increased by IFN-  
291  $\beta$  treatment for multiple sclerosis (MS) (38). The early induction of IFN in patients of the  
292 NNTC dataset (patients with HIV without NCI, group B) is reminiscent of previous  
293 studies in which IFN induction was not closely correlated with NCI, e.g., (39), and raises  
294 the possibilities that either protracted IFN dysregulation may be required to produce NCI  
295 or that it may be a co-factor in NCI pathogenesis.

296

297         Also evident in HIV-infected patients without NCI was the activation of  
298 mechanisms indicative of tissue injury, such as expression of matrix metalloproteases  
299 (MMP) and complement-related genes in the white matter. MMP expression by HIV-1  
300 infected monocytes and macrophages is recognized as a pathogenic mechanism in  
301 neuroAIDS (40). Elevated MMP levels can contribute to microglial activation, infiltrate  
302 through cleavage of adhesion molecules, neuronal and synaptic injury, as well as blood-  
303 brain barrier disruption (41-44). MMP increases were present in the white matter in HIV-  
304 infected patients with NCI and no HIVE. In patients with HIVE, induction of MMPs was  
305 also evident in the prefrontal cortex and basal ganglia.

306 Another key finding in the study is that patients with NCI without HIVE (group C)  
307 in the NNTC cohort did not show significant activation of IFN, unlike patients in groups B  
308 and D. This discordant regulation of IFN signaling did not appear to be associated with  
309 antiretroviral therapy as patients with NCI and no HIVE include both patients treated  
310 with antiretrovirals and untreated patients. Conversely, patients with NCI without HIVE  
311 (group C) had increased expression of chemokines, cytokines and  $\beta$ -defensins in the  
312 white matter. Other pro-inflammatory markers were also concomitantly increased in the  
313 white matter of patients with NCI and no HIVE. Evidence of chemokine and cytokine  
314 expression were present in all HIV-infected groups in the study.  $\beta$ -defensins were  
315 induced also in patients with HIVE.

316

317 Chemokines have been implicated in impairing cognition, Alzheimer's disease  
318 and depression as well as other psychiatric conditions (45). Increased immunoreactivity  
319 for MCP-2 was noted in MS lesions (46). A chemokine gene cluster has been  
320 associated with age of onset of Alzheimer's (47). A higher level of CCL2 in CSF, and a  
321 CCL2 -2578G allele, have been associated with worse neurocognitive functioning in HIV  
322 (48). Animal studies, while scant, are consistent with a possible role for chemokines in  
323 NCI. For instance, chemokine signaling was increased by SIV infection and  
324 methamphetamine exposure in macaques (49, 50). Chemokines can induce changes  
325 leading to impaired hippocampal synaptic transmission, plasticity and memory (50, 51).  
326 Evidence also suggests a role for defensins in the chronic inflammation associated with  
327 degenerative brain diseases, and in particular Alzheimer's disease (52, 53). Defensin-  
328 related pathways were also induced in HIVE, but showed no consistent regulation in



329 HIV-infected patients with no NCI, suggesting a possible contribution to the  
330 pathogenesis of NCI.

331  
332 In HIV without NCI, genes related to neurotransmission were also downregulated  
333 in the prefrontal cortex and basal ganglia while genes related to apoptosis, such as  
334 calpain-related mechanisms, which contribute to neurodegeneration in HIV (54), were  
335 induced in the basal ganglia and prefrontal cortex. Conversely, no pathways showed  
336 significant dysregulations in the prefrontal cortex and basal ganglia in HIV patients with  
337 NCI and no HIVE. In HIVE, multiple pathways indicative of impaired mitochondria and  
338 energy metabolism were differentially regulated. In NCI without HIVE, we observed  
339 increased expression of cytochrome P450 enzymes, which may indicate oxidative  
340 stress (55).

341  
342 The anatomical distribution of the gene expression programs dysregulated in the  
343 NNTC dataset appears to reflect brain-region specific dynamics in neurological disease  
344 progression in HIV/AIDS. In particular, we observed some degree of white matter  
345 alteration of gene expression in all HIV-infected groups with and without NCI and HIVE.  
346 However, gene expression changes in patients with NCI without HIVE (group C) were  
347 localized to the white matter and had a specific gene expression profile. Lack of gene  
348 expression changes suggestive of neuronal injury in the prefrontal cortex and basal  
349 ganglia in patients with NCI without HIVE (group C) suggests that they may not be  
350 accompanied by significant neuronal atrophy, but that white matter pathology likely  
351 drives NCI in these patients. Prominent white matter gene expression changes were  
352 also present in HIVE, which was also characterized by considerable gene expression

353 changes in the prefrontal cortex and basal ganglia. White matter damage correlating  
354 with the severity of cognitive manifestations has been observed since the early days of  
355 the HIV pandemic (8, 56). Evidence of white matter injury in HIV-infected patients with  
356 and without NCI is also demonstrated in recent imaging studies (57, 58). In addition to  
357 white matter changes, gene expression in HIVE was characterized by considerable  
358 changes in the prefrontal cortex and basal ganglia. This is also in apparent agreement  
359 with the association of NCI with progression of functional abnormalities involving the  
360 basal ganglia and the prefrontal cortex as well as with generalized white matter damage  
361 (56, 59-62).

362

363         The present study has several limitations. Primarily, the NNTC dataset groups  
364 are of small sample size that was further reduced as part of the quality control analysis.  
365 Larger studies will be needed to better understand the pathogenesis and progression of  
366 neurological disease and to adequately represent all possible variants of central  
367 nervous system disease. For instance, gene expression results of the group of HIV-  
368 infected patients with NCI and without HIVE raise several questions, including if this is a  
369 distinct nosologic variant of neuroAIDS or if it is a stage in the progression of HIV brain  
370 disease.

371

372         In conclusion, in the present study we explored patterns of gene expression  
373 dysregulation in patients in the NNTC neuroAIDS gene expression dataset. Results  
374 point to gene expression changes indicative of immune activation characterized by IFN  
375 and cytokine expression as well as evidence of neuronal suffering preceding NCI.  
376 Interestingly, the group of HIV-infected patients with NCI without HIVE showed a

377 preeminently white matter dysfunction characterized by a distinct pattern of immune  
378 activation with low IFN. Larger studies are necessary to better understand the  
379 pathogenesis of neurological disease and its progression, to evaluate the impact of  
380 therapy on various HIV disease conditions, and to identify better therapeutic targets and  
381 strategies for NCI in HIV.

382 **Competing interests**

383 The authors declare that they have no competing interests"

384

385 **Authors' contributions**

386 PPS and CL designed study, analyzed data

387 PPS, VRC, EM, and CL interpreted results and wrote paper

388

389 **Acknowledgements**

390 This is manuscript #29423 from The Scripps Research Institute. This work was

391 supported by the National Institutes of Health grant numbers AA021667, DA041750,

392 DA043268

393

394

## 395 References

- 396 1. **Heaton RK, Franklin DR, Ellis RJ, McCutchan JA, Letendre SL, Leblanc S,**  
397 **Corkran SH, Duarte NA, Clifford DB, Woods SP, Collier AC, Marra CM,**  
398 **Morgello S, Mindt MR, Taylor MJ, Marcotte TD, Atkinson JH, Wolfson T,**  
399 **Gelman BB, McArthur JC, Simpson DM, Abramson I, Gamst A, Fennema-**  
400 **Notestine C, Jernigan TL, Wong J, Grant I.** 2011. HIV-associated  
401 neurocognitive disorders before and during the era of combination antiretroviral  
402 therapy: differences in rates, nature, and predictors. *J Neurovirol* **17**:3-16.
- 403 2. **Cysique LA, Maruff P, Brew BJ.** 2004. Prevalence and pattern of  
404 neuropsychological impairment in human immunodeficiency virus-  
405 infected/acquired immunodeficiency syndrome (HIV/AIDS) patients across pre-  
406 and post-highly active antiretroviral therapy eras: a combined study of two  
407 cohorts. *J Neurovirol* **10**:350-357.
- 408 3. **Tozzi V, Balestra P, Serraino D, Bellagamba R, Corpolongo A, Piselli P,**  
409 **Lorenzini P, Visco-Comandini U, Vlassi C, Quartuccio ME, Giulianelli M,**  
410 **Noto P, Galgani S, Ippolito G, Antinori A, Narciso P.** 2005. Neurocognitive  
411 impairment and survival in a cohort of HIV-infected patients treated with HAART.  
412 *AIDS Res Hum Retroviruses* **21**:706-713.
- 413 4. **Neuenburg JK, Brodt HR, Herndier BG, Bickel M, Bacchetti P, Price RW,**  
414 **Grant RM, Schlote W.** 2002. HIV-related neuropathology, 1985 to 1999: rising  
415 prevalence of HIV encephalopathy in the era of highly active antiretroviral  
416 therapy. *J Acquir Immune Defic Syndr* **31**:171-177.
- 417 5. **McArthur JC.** 2004. HIV dementia: an evolving disease. *J Neuroimmunol* **157**:3-  
418 10.
- 419 6. **Brew BJ.** 2004. Evidence for a change in AIDS dementia complex in the era of  
420 highly active antiretroviral therapy and the possibility of new forms of AIDS  
421 dementia complex. *Aids* **18 Suppl 1**:S75-78.
- 422 7. **Everall I, Vaida F, Khanlou N, Lazzaretto D, Achim C, Letendre S, Moore D,**  
423 **Ellis R, Cherne M, Gelman B, Morgello S, Singer E, Grant I, Masliah E.** 2009.  
424 Cliniconeuropathologic correlates of human immunodeficiency virus in the era of  
425 antiretroviral therapy. *J Neurovirol* doi:914601275 [pii]  
426 10.1080/13550280903131915:1-11.
- 427 8. **Everall IP, Hansen LA, Masliah E.** 2005. The shifting patterns of HIV  
428 encephalitis neuropathology. *Neurotox Res* **8**:51-61.
- 429 9. **Persidsky Y, Gendelman HE.** 2003. Mononuclear phagocyte immunity and the  
430 neuropathogenesis of HIV-1 infection. *J Leukoc Biol* **74**:691-701.
- 431 10. **McArthur JC, Hoover DR, Bacellar H, Miller EN, Cohen BA, Becker JT,**  
432 **Graham NM, McArthur JH, Selnes OA, Jacobson LP, et al.** 1993. Dementia in  
433 AIDS patients: incidence and risk factors. Multicenter AIDS Cohort Study.  
434 *Neurology* **43**:2245-2252.
- 435 11. **Ellis R, Langford D, Masliah E.** 2007. HIV and antiretroviral therapy in the brain:  
436 neuronal injury and repair. *Nat Rev Neurosci* **8**:33-44.
- 437 12. **Masliah E, Heaton RK, Marcotte TD, Ellis RJ, Wiley CA, Mallory M, Achim**  
438 **CL, McCutchan JA, Nelson JA, Atkinson JH, Grant I.** 1997. Dendritic injury is  
439 a pathological substrate for human immunodeficiency virus-related cognitive  
440 disorders. HNRC Group. The HIV Neurobehavioral Research Center. *Ann Neurol*  
441 **42**:963-972.

- 442 13. **McPhail ME, Robertson KR.** 2011. Neurocognitive impact of antiretroviral  
443 treatment: thinking long-term. *Curr HIV/AIDS Rep* **8**:249-256.
- 444 14. **Simioni S, Cavassini M, Annoni JM, Rimbault Abraham A, Bourquin I,**  
445 **Schiffer V, Calmy A, Chave JP, Giacobini E, Hirschel B, Du Pasquier RA.**  
446 2010. Cognitive dysfunction in HIV patients despite long-standing suppression of  
447 viremia. *AIDS* **24**:1243-1250.
- 448 15. **Desplats P, Dumaop W, Smith D, Adame A, Everall I, Letendre S, Ellis R,**  
449 **Cherner M, Grant I, Masliah E.** 2013. Molecular and pathologic insights from  
450 latent HIV-1 infection in the human brain. *Neurology* **80**:1415-1423.
- 451 16. **Kraft-Terry SD, Buch SJ, Fox HS, Gendelman HE.** 2009. A coat of many  
452 colors: neuroimmune crosstalk in human immunodeficiency virus infection.  
453 *Neuron* **64**:133-145.
- 454 17. **Levine AJ, Soontornniyomkij V, Achim CL, Masliah E, Gelman BB,**  
455 **Sinsheimer JS, Singer EJ, Moore DJ.** 2016. Multilevel analysis of  
456 neuropathogenesis of neurocognitive impairment in HIV. *J Neurovirol* **22**:431-  
457 441.
- 458 18. **Gelman BB, Chen T, Lisinicchia JG, Soukup VM, Carmical JR, Starkey JM,**  
459 **Masliah E, Commins DL, Brandt D, Grant I, Singer EJ, Levine AJ, Miller J,**  
460 **Winkler JM, Fox HS, Luxon BA, Morgello S.** 2012. The National NeuroAIDS  
461 Tissue Consortium brain gene array: two types of HIV-associated neurocognitive  
462 impairment. *PLoS One* **7**:e46178.
- 463 19. **Subramanian A, Tamayo P, Mootha VK, Mukherjee S, Ebert BL, Gillette MA,**  
464 **Paulovich A, Pomeroy SL, Golub TR, Lander ES, Mesirov JP.** 2005. Gene set  
465 enrichment analysis: a knowledge-based approach for interpreting genome-wide  
466 expression profiles. *Proc Natl Acad Sci U S A* **102**:15545-15550.
- 467 20. **Liberzon A, Birger C, Thorvaldsdottir H, Ghandi M, Mesirov JP, Tamayo P.**  
468 2015. The Molecular Signatures Database (MSigDB) hallmark gene set  
469 collection. *Cell Syst* **1**:417-425.
- 470 21. **Lim WK, Wang K, Lefebvre C, Califano A.** 2007. Comparative analysis of  
471 microarray normalization procedures: effects on reverse engineering gene  
472 networks. *Bioinformatics* **23**:i282-288.
- 473 22. **Schrier RD, Hong S, Crescini M, Ellis R, Perez-Santiago J, Spina C,**  
474 **Letendre S, Group H.** 2015. Cerebrospinal fluid (CSF) CD8+ T-cells that  
475 express interferon-gamma contribute to HIV associated neurocognitive disorders  
476 (HAND). *PLoS One* **10**:e0116526.
- 477 23. **Gelman BB, Lisinicchia JG, Morgello S, Masliah E, Commins D, Achim CL,**  
478 **Fox HS, Kolson DL, Grant I, Singer E, Yiannoutsos CT, Sherman S, Gensler**  
479 **G, Moore DJ, Chen T, Soukup VM.** 2013. Neurovirological correlation with HIV-  
480 associated neurocognitive disorders and encephalitis in a HAART-era cohort. *J*  
481 *Acquir Immune Defic Syndr* **62**:487-495.
- 482 24. **Gao HM, Hong JS.** 2008. Why neurodegenerative diseases are progressive:  
483 uncontrolled inflammation drives disease progression. *Trends Immunol* **29**:357-  
484 365.
- 485 25. **Rho MB, Wesselingh S, Glass JD, McArthur JC, Choi S, Griffin J, Tyor WR.**  
486 1995. A potential role for interferon-alpha in the pathogenesis of HIV-associated  
487 dementia. *Brain Behav Immun* **9**:366-377.
- 488 26. **Zheng J, Thylin MR, Persidsky Y, Williams CE, Cotter RL, Zink W, Ryan L,**  
489 **Gharpade A, Lewis K, Gendelman HE.** 2001. HIV-1 infected immune

- 490 competent mononuclear phagocytes influence the pathways to neuronal demise.  
491 Neurotox Res **3**:461-484.
- 492 27. **Tyor WR, Glass JD, Griffin JW, Becker PS, McArthur JC, Bezman L, Griffin**  
493 **DE.** 1992. Cytokine expression in the brain during the acquired  
494 immunodeficiency syndrome. Ann Neurol **31**:349-360.
- 495 28. **Perrella O, Carreiri PB, Perrella A, Sbreglia C, Gorga F, Guarnaccia D,**  
496 **Tarantino G.** 2001. Transforming growth factor beta-1 and interferon-alpha in the  
497 AIDS dementia complex (ADC): possible relationship with cerebral viral load?  
498 Eur Cytokine Netw **12**:51-55.
- 499 29. **Ryan LA, Cotter RL, Zink WE, 2nd, Gendelman HE, Zheng J.** 2002.  
500 Macrophages, chemokines and neuronal injury in HIV-1-associated dementia.  
501 Cell Mol Biol (Noisy-le-grand) **48**:137-150.
- 502 30. **Krivine A, Force G, Servan J, Cabee A, Rozenberg F, Dighiero L, Marguet F,**  
503 **Lebon P.** 1999. Measuring HIV-1 RNA and interferon-alpha in the cerebrospinal  
504 fluid of AIDS patients: insights into the pathogenesis of AIDS Dementia Complex.  
505 J Neurovirol **5**:500-506.
- 506 31. **Boehm U, Klamp T, Groot M, Howard JC.** 1997. Cellular responses to  
507 interferon-gamma. Annu Rev Immunol **15**:749-795.
- 508 32. **Burrone OR, Milstein C.** 1982. Control of HLA-A,B,C synthesis and expression  
509 in interferon-treated cells. EMBO J **1**:345-349.
- 510 33. **Calabresi PA, Tranquill LR, Dambrosia JM, Stone LA, Maloni H, Bash CN,**  
511 **Frank JA, McFarland HF.** 1997. Increases in soluble VCAM-1 correlate with a  
512 decrease in MRI lesions in multiple sclerosis treated with interferon beta-1b. Ann  
513 Neurol **41**:669-674.
- 514 34. **Hofer MJ, Campbell IL.** 2013. Type I interferon in neurological disease-the devil  
515 from within. Cytokine Growth Factor Rev **24**:257-267.
- 516 35. **Campbell IL, Krucker T, Steffensen S, Akwa Y, Powell HC, Lane T, Carr DJ,**  
517 **Gold LH, Henriksen SJ, Siggins GR.** 1999. Structural and functional  
518 neuropathology in transgenic mice with CNS expression of IFN-alpha. Brain Res  
519 **835**:46-61.
- 520 36. **Blank T, Detje CN, Spiess A, Hagemeyer N, Brendecke SM, Wolfart J,**  
521 **Staszewski O, Zoller T, Papageorgiou I, Schneider J, Paricio-Montesinos R,**  
522 **Eisel UL, Manahan-Vaughan D, Jansen S, Lienenklaus S, Lu B, Imai Y,**  
523 **Muller M, Goelz SE, Baker DP, Schwaninger M, Kann O, Heikenwalder M,**  
524 **Kalinke U, Prinz M.** 2016. Brain Endothelial- and Epithelial-Specific Interferon  
525 Receptor Chain 1 Drives Virus-Induced Sickness Behavior and Cognitive  
526 Impairment. Immunity **44**:901-912.
- 527 37. **Filiano AJ, Xu Y, Tustison NJ, Marsh RL, Baker W, Smirnov I, Overall CC,**  
528 **Gadani SP, Turner SD, Weng Z, Peerzade SN, Chen H, Lee KS, Scott MM,**  
529 **Beenhakker MP, Litvak V, Kipnis J.** 2016. Unexpected role of interferon-  
530 gamma in regulating neuronal connectivity and social behaviour. Nature  
531 doi:10.1038/nature18626.
- 532 38. **Schippling S, O'Connor P, Knappertz V, Pohl C, Bogumil T, Suarez G, Cook**  
533 **S, Filippi M, Hartung HP, Comi G, Jeffery DR, Kappos L, Goodin DS,**  
534 **Arnason B.** 2016. Incidence and course of depression in multiple sclerosis in the  
535 multinational BEYOND trial. J Neurol **263**:1418-1426.

- 536 39. **Shapshak P, Duncan R, Minagar A, Rodriguez de la Vega P, Stewart RV,**  
537 **Goodkin K.** 2004. Elevated expression of IFN-gamma in the HIV-1 infected  
538 brain. *Front Biosci* **9**:1073-1081.
- 539 40. **Webster NL, Crowe SM.** 2006. Matrix metalloproteinases, their production by  
540 monocytes and macrophages and their potential role in HIV-related diseases. *J*  
541 *Leukoc Biol* **80**:1052-1066.
- 542 41. **Conant K, Lim ST, Randall B, Maguire-Zeiss KA.** 2012. Matrix  
543 metalloproteinase dependent cleavage of cell adhesion molecules in the  
544 pathogenesis of CNS dysfunction with HIV and methamphetamine. *Curr HIV Res*  
545 **10**:384-391.
- 546 42. **Dziembowska M, Wlodarczyk J.** 2012. MMP9: a novel function in synaptic  
547 plasticity. *Int J Biochem Cell Biol* **44**:709-713.
- 548 43. **Nottet HS.** 1999. Interactions between macrophages and brain microvascular  
549 endothelial cells: role in pathogenesis of HIV-1 infection and blood - brain barrier  
550 function. *J Neurovirol* **5**:659-669.
- 551 44. **Louboutin JP, Strayer DS.** 2012. Blood-brain barrier abnormalities caused by  
552 HIV-1 gp120: mechanistic and therapeutic implications. *ScientificWorldJournal*  
553 **2012**:482575.
- 554 45. **Stuart MJ, Baune BT.** 2014. Chemokines and chemokine receptors in mood  
555 disorders, schizophrenia, and cognitive impairment: a systematic review of  
556 biomarker studies. *Neurosci Biobehav Rev* **42**:93-115.
- 557 46. **McManus C, Berman JW, Brett FM, Staunton H, Farrell M, Brosnan CF.**  
558 1998. MCP-1, MCP-2 and MCP-3 expression in multiple sclerosis lesions: an  
559 immunohistochemical and in situ hybridization study. *J Neuroimmunol* **86**:20-29.
- 560 47. **Lalli MA, Bettcher BM, Arcila ML, Garcia G, Guzman C, Madrigal L, Ramirez**  
561 **L, Acosta-Uribe J, Baena A, Wojta KJ, Coppola G, Fitch R, de Both MD,**  
562 **Huentelman MJ, Reiman EM, Brunkow ME, Glusman G, Roach JC, Kao AW,**  
563 **Lopera F, Kosik KS.** 2015. Whole-genome sequencing suggests a chemokine  
564 gene cluster that modifies age at onset in familial Alzheimer's disease. *Mol*  
565 *Psychiatry* **20**:1294-1300.
- 566 48. **Thames AD, Briones MS, Magpantay LI, Martinez-Maza O, Singer EJ, Hinkin**  
567 **CH, Morgello S, Gelman BB, Moore DJ, Heizerling K, Levine AJ.** 2015. The  
568 role of chemokine C-C motif ligand 2 genotype and cerebrospinal fluid  
569 chemokine C-C motif ligand 2 in neurocognition among HIV-infected patients.  
570 *AIDS* **29**:1483-1491.
- 571 49. **Najera JA, Bustamante EA, Bortell N, Morsey B, Fox HS, Ravasi T,**  
572 **Marcondes MC.** 2016. Methamphetamine abuse affects gene expression in  
573 brain-derived microglia of SIV-infected macaques to enhance inflammation and  
574 promote virus targets. *BMC Immunol* **17**:7.
- 575 50. **Gersten M, Alirezaei M, Marcondes MC, Flynn C, Ravasi T, Ideker T, Fox HS.**  
576 2009. An integrated systems analysis implicates EGR1 downregulation in simian  
577 immunodeficiency virus encephalitis-induced neural dysfunction. *J Neurosci*  
578 **29**:12467-12476.
- 579 51. **Marciniak E, Faivre E, Dutar P, Alves Pires C, Demeyer D, Caillierez R,**  
580 **Laloux C, Buee L, Blum D, Humez S.** 2015. The Chemokine MIP-1alpha/CCL3  
581 impairs mouse hippocampal synaptic transmission, plasticity and memory. *Sci*  
582 *Rep* **5**:15862.



- 583 52. **Brook M, Tomlinson GH, Miles K, Smith RW, Rossi AG, Hiemstra PS, van 't**  
584 **Wout EF, Dean JL, Gray NK, Lu W, Gray M.** 2016. Neutrophil-derived alpha  
585 defensins control inflammation by inhibiting macrophage mRNA translation. *Proc*  
586 *Natl Acad Sci U S A* **113**:4350-4355.
- 587 53. **Williams WM, Torres S, Siedlak SL, Castellani RJ, Perry G, Smith MA, Zhu**  
588 **X.** 2013. Antimicrobial peptide beta-defensin-1 expression is upregulated in  
589 Alzheimer's brain. *J Neuroinflammation* **10**:127.
- 590 54. **Zyskind JW, Wang Y, Cho G, Ting JH, Kolson DL, Lynch DR, Jordan-Sciutto**  
591 **KL.** 2015. E2F1 in neurons is cleaved by calpain in an NMDA receptor-  
592 dependent manner in a model of HIV-induced neurotoxicity. *J Neurochem*  
593 **132**:742-755.
- 594 55. **Ade A, Sinha N, Rao PS, McArthur CP, Ayuk L, Achu PN, Njinda A, Kumar**  
595 **A, Kumar S.** 2015. Enhanced oxidative stress by alcohol use in HIV+ patients:  
596 possible involvement of cytochrome P450 2E1 and antioxidant enzymes. *AIDS*  
597 *Res Ther* **12**:29.
- 598 56. **Aylward EH, Brettschneider PD, McArthur JC, Harris GJ, Schlaepfer TE,**  
599 **Henderer JD, Barta PE, Tien AY, Pearlson GD.** 1995. Magnetic resonance  
600 imaging measurement of gray matter volume reductions in HIV dementia. *Am J*  
601 *Psychiatry* **152**:987-994.
- 602 57. **Gongvatana A, Schweinsburg BC, Taylor MJ, Theilmann RJ, Letendre SL,**  
603 **Alhassoon OM, Jacobus J, Woods SP, Jernigan TL, Ellis RJ, Frank LR,**  
604 **Grant I, Charter G.** 2009. White matter tract injury and cognitive impairment in  
605 human immunodeficiency virus-infected individuals. *J Neurovirol* **15**:187-195.
- 606 58. **Stubbe-Drger B, Deppe M, Mohammadi S, Keller SS, Kugel H, Gregor N,**  
607 **Evers S, Young P, Ringelstein EB, Arendt G, Knecht S, Husstedt IW,**  
608 **German Competence Network HA.** 2012. Early microstructural white matter  
609 changes in patients with HIV: a diffusion tensor imaging study. *BMC Neurol*  
610 **12**:23.
- 611 59. **Everall IP, Heaton RK, Marcotte TD, Ellis RJ, McCutchan JA, Atkinson JH,**  
612 **Grant I, Mallory M, Masliah E.** 1999. Cortical synaptic density is reduced in mild  
613 to moderate human immunodeficiency virus neurocognitive disorder. HNRC  
614 Group. HIV Neurobehavioral Research Center. *Brain Pathol* **9**:209-217.
- 615 60. **Ipser JC, Brown GG, Bischoff-Grethe A, Connolly CG, Ellis RJ, Heaton RK,**  
616 **Grant I, Translational Methamphetamine ARCG.** 2015. HIV infection is  
617 associated with attenuated frontostriatal intrinsic connectivity: a preliminary  
618 study. *J Int Neuropsychol Soc* **21**:203-213.
- 619 61. **Steinbrink F, Evers S, Buerke B, Young P, Arendt G, Koutsilieri E, Reichelt**  
620 **D, Lohmann H, Husstedt IW, German Competence Network HA.** 2013.  
621 Cognitive impairment in HIV infection is associated with MRI and CSF pattern of  
622 neurodegeneration. *Eur J Neurol* **20**:420-428.
- 623 62. **Kuper M, Rabe K, Esser S, Gizewski ER, Husstedt IW, Maschke M,**  
624 **Obermann M.** 2011. Structural gray and white matter changes in patients with  
625 HIV. *J Neurol* **258**:1066-1075.
- 626

627

628 **Captions to the Figures**

629 **Figure 1: A) Number of Pathways differentially regulated in each transition in**  
630 **each brain region.** \*Numbers in brackets indicate the number of pathways selectively  
631 differentially regulated in that region for a particular transition as compared to the other  
632 2 brain regions. **B) Bar plot showing the number of pathways significantly**  
633 **differentially regulated per comparison (FDR < 0.01).** WM=White Matter; FC =  
634 Frontal Cortex; BG = Basal Ganglia. Common pathways define pathways significant in  
635 at least 2 regions.

636

637 **Figure 2: Differential regulation of IFN-related pathways in the groups of the**  
638 **NNTC gene expression dataset. A) Gene expression evidence of interferon (IFN)**  
639 **activation HIV-infected patients without NCI.** The diagrams show GSEA plots for 3  
640 pathways representative of IFN activation in HIV-infected patients without NCI (group B,  
641 left-hand side in the GSEA plot) as compared to uninfected controls (group A right-hand  
642 side). Each pathway was tested in each region independently. WM = White Matter; FC  
643 = Frontal Cortex; BG = Basal Ganglia. These pathways are indicative of type I IFN  
644 activation and include IFN-related genes in **Top) INTERFERON ALPHA BETA**  
645 **SIGNALING, Middle) type II IFN activation (INTERFERON GAMMA SIGNALING), and**  
646 **Bottom) ANTIGEN PRESENTATION FOLDING ASSEMBLY AND PEPTIDE LOADING**  
647 **OF MHC CLASS I, a pathway involving several IFN-regulated MHC class I genes.**  
648 Significant changes in the expression of the pathways is indicated by the asymmetric  
649 distribution of the genes in the geneset (vertical bars) and of the running enrichment  
650 score plot (ES) (19). Genes participating in the enrichment (on the left of the leading  
651 edge corresponding to the peak of the running enrichment in GSEA) are shown in Fig.

652 **3. B) Differential regulation of IFN-related pathways in the 4 groups of the NNTC**  
653 **gene expression dataset.** Significant activation of pathways related to both type I and  
654 type II IFN was seen in a brain region-specific pattern in HIV-infected patients without  
655 NCI (group B) and in patients with HIVE (group D). **Top)** INTERFERON ALPHA BETA  
656 SIGNALING in the white Matter, frontal cortex and basal ganglia; **Middle)**  
657 INTERFERON GAMMA SIGNALING; and **Bottom)** ANTIGEN PRESENTATION  
658 FOLDING ASSEMBLY AND PEPTIDE LOADING OF MHC CLASS I, in the same three  
659 regions. Each plot represents the pathway activity (computed as an enrichment score)  
660 in the 4 different phenotypes and is annotated with the FDR values of respective GSEA  
661 comparisons.

662

663 **Figure 3: Genes differentially expressed in HIV-infected patients without NCI.** The  
664 heatmap shows the genes in the leading edge of the pathways commonly dysregulated  
665 in all 3 brain regions in HIV-infected patients without NCI as compared to uninfected  
666 controls. We selected the 54 genes most differentially expressed (t-test, p-value < 0.01)  
667 among the list of 128 genes belonging to the leading edges of the significant pathways  
668 identified by the GSEA analysis in HIV-infected patients without NCI in comparison with  
669 uninfected controls.

670

671 **Figure 4: Evidence of neuronal injury in HIV infected patients with HIV without**  
672 **NCI. A) and B)** Downregulation of genes related to neuronal transmission in patients  
673 with HIV without NCI (group B, left-hand side in the GSEA plot) vs. uninfected controls  
674 (Group A). **C)** Upregulation of apoptotic-related pathways in the frontal cortex and basal  
675 ganglia of HIV-infected patients without NCI (group B).

676

677 **Figure 5: White matter changes in HIV-infected patients with NCI without HIV.**

678 GSEA plots representative of induction of cytokines, chemokines and  $\beta$ -defensins in the  
679 HIV-infected patients with NCI without HIV (group C in the NNTC gene expression  
680 dataset) as compared to uninfected controls.

681

682 **Figure 6: Gene expression evidence of neurodegeneration in in Frontal Cortex of**

683 **patients with HIV. A)** Huntington's disease-related pathways is downregulated in  
684 frontal cortex of patients with HIV (group D) as compared to patients with NCI and no  
685 HIV as well as with patients without NCI. Similarly, **(B)** and **(C)** show Parkinson's  
686 disease and Neuronal System pathways respectively. Each row represents the pathway  
687 activity (computed as an enrichment score) in the 4 different phenotypes and is  
688 annotated with the FDR values of respective GSEA comparisons, followed by GSEA  
689 plots of the pathways in the group D vs group B and group D vs. group C comparisons  
690 in frontal cortex.

691 **Table 1 Pathways differentially regulated in multiple brain regions in patients**  
 692 **infected with HIV without NCI as compared to uninfected controls.**

| Table 1<br>Pathways                                                               | WM    |       | FC    |       | BG    |      |
|-----------------------------------------------------------------------------------|-------|-------|-------|-------|-------|------|
|                                                                                   | NES   | FDR   | NES   | FDR   | NES   | FDR  |
| REACTOME INTERFERON ALPHA BETA SIGNALING                                          | 2.59  | 0     | 2.28  | 0     | 2.06  | 2E-3 |
| REACTOME INTERFERON SIGNALING                                                     | 2.53  | 0     | 2.20  | 0     | 2.10  | 7E-4 |
| REACTOME ANTIGEN PRESENTATION FOLDING ASSEMBLY AND PEPTIDE LOADING OF CLASS I MHC | 2.23  | 2E-4  | 2.20  | 0     | 2.19  | 0    |
| REACTOME ANTIGEN PROCESSING CROSS PRESENTATION                                    | 1.97  | 8E-3  | 2.11  | 8E-4  | 2.46  | 0    |
| REACTOME CYTOKINE SIGNALING IN IMMUNE SYSTEM                                      | 2.11  | 7E-4  | 1.95  | 7E-3  | 2.01  | 3E-3 |
| REACTOME INTERFERON GAMMA SIGNALING                                               | 2.66  | 0     | 1.85  | 2E-2  | 1.93  | 6E-3 |
| REACTOME ER PHAGOSOME PATHWAY                                                     | 1.75  | 5E-2  | 2.21  | 0     | 2.45  | 0    |
| REACTOME ANTIVIRAL MECHANISM BY IFN STIMULATED GENES                              | 1.42  | 3E-01 | 2.10  | 1E-3  | 2.32  | 0    |
| REACTOME CLASS I MHC MEDIATED ANTIGEN PROCESSING PRESENTATION                     | 1.20  | 5E-1  | 2.05  | 2E-3  | 2.15  | 1E-4 |
| REACTOME HOST INTERACTIONS OF HIV FACTORS                                         | 1.03  | 7E-1  | 2.15  | 0     | 2.19  | 0    |
| REACTOME ORC1 REMOVAL FROM CHROMATIN                                              | 1.17  | 6E-1  | 1.94  | 8E-3  | 2.09  | 9E-4 |
| REACTOME APC C CDC20 MEDIATED DEGRADATION OF MITOTIC PROTEINS                     | 1.13  | 6E-1  | 1.93  | 8E-3  | 2.10  | 6E-4 |
| REACTOME REGULATION OF MRNA STABILITY BY PROTEINS THAT BIND AU RICH ELEMENTS      | 1.05  | 7E-1  | 1.96  | 6E-3  | 2.04  | 2E-3 |
| REACTOME HIV INFECTION                                                            | -0.90 | 9E-1  | 2.17  | 0     | 2.11  | 6E-4 |
| REACTOME METABOLISM OF RNA                                                        | -0.96 | 8E-1  | 2.07  | 1E-3  | 2.03  | 2E-3 |
| KEGG NEUROACTIVE LIGAND RECEPTOR INTERACTION                                      | -1.39 | 4E-1  | -2.34 | 2E-4  | -2.39 | 0    |
| REACTOME OLFACTORY SIGNALING PATHWAY                                              | -0.85 | 9E-1  | -2.61 | 0     | -2.39 | 0    |
| REACTOME GPCR LIGAND BINDING                                                      | -1.13 | 6E-1  | -2.19 | 8E-04 | -2.37 | 0    |
| KEGG OLFACTORY TRANSDUCTION                                                       | -0.84 | 9E-1  | -2.46 | 0     | -2.37 | 0    |
| REACTOME CLASS A1 RHODOPSIN LIKE RECEPTORS                                        | -1.04 | 7E-1  | -2.20 | 6E-4  | -2.38 | 0    |
| REACTOME LIGAND GATED ION CHANNEL TRANSPORT                                       | -1.35 | 4E-1  | -2.11 | 3E-3  | -1.91 | 6E-3 |
| REACTOME PEPTIDE LIGAND BINDING RECEPTORS                                         | -1.06 | 7E-1  | -2.02 | 7E-3  | -2.29 | 0    |
| NABA MATRISOME ASSOCIATED                                                         | 1.23  | 5E-1  | -2.05 | 5E-3  | -2.30 | 0    |
| NABA ECM REGULATORS                                                               | 1.01  | 8E-1  | -1.98 | 9E-3  | -1.89 | 8E-3 |

693 The table shows pathways dysregulated in at least 2 brain regions in patients infected  
694 with HIV without NCI compared to uninfected controls. The dataset was interrogated for  
695 pathway enrichment using the canonical pathways from the MSigDb C2 collection using  
696 GSEA. The GSEA pathway analysis results show gene expression changes involving  
697 immune activation and neuronal injury that precede the onset of clinical NCI. Results  
698 show gene expression changes indicative of immune activation characterized by IFN  
699 and cytokine expression as well as evidence of neuronal suffering preceding NCI.

700

701 NES: normalized enrichment score; FDR: false discovery rate; WM: white matter; FC:  
702 frontal cortex; BG: basal ganglia.

703

A

| Comparisons | Brain regions |                   |               | Common pathways |
|-------------|---------------|-------------------|---------------|-----------------|
|             | White Matter  | Prefrontal Cortex | Basal Ganglia |                 |
| B vs. A     | 21 (6)*       | 41 (4)            | 82 (1)        | 24              |
| C vs. A     | 33 (33)       | 0                 | 0             | 0               |
| C vs. B     | 14 (0)        | 85 (47)           | 3 (1)         | 2               |
| D vs. B     | 0             | 171 (121)         | 32 (16)       | 3               |
| D vs. C     | 24 (0)        | 102 (37)          | 88 (11)       | 27              |

B

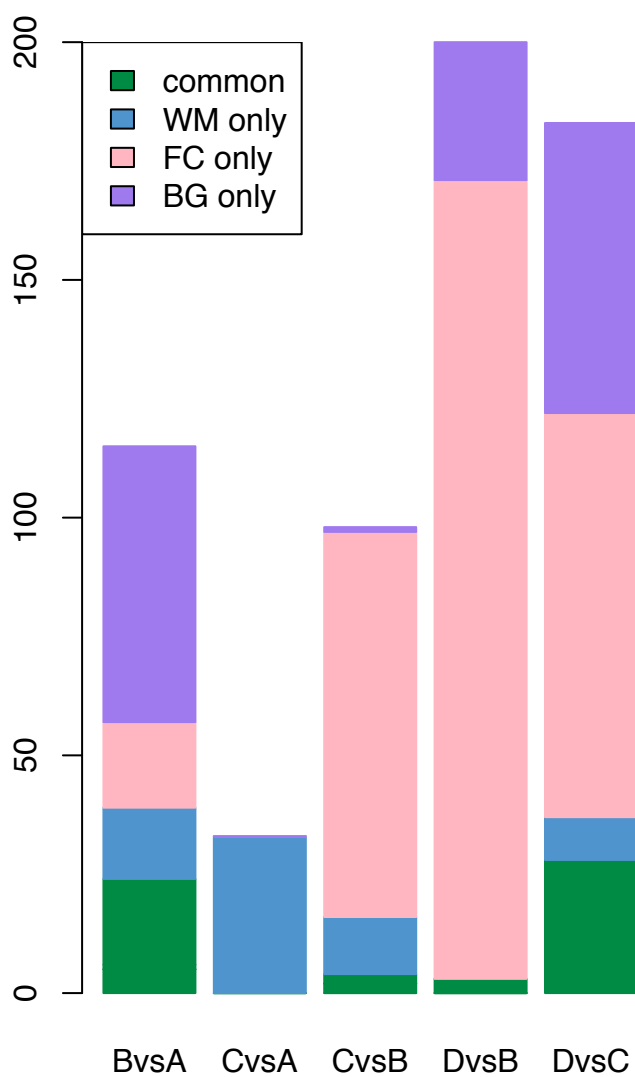

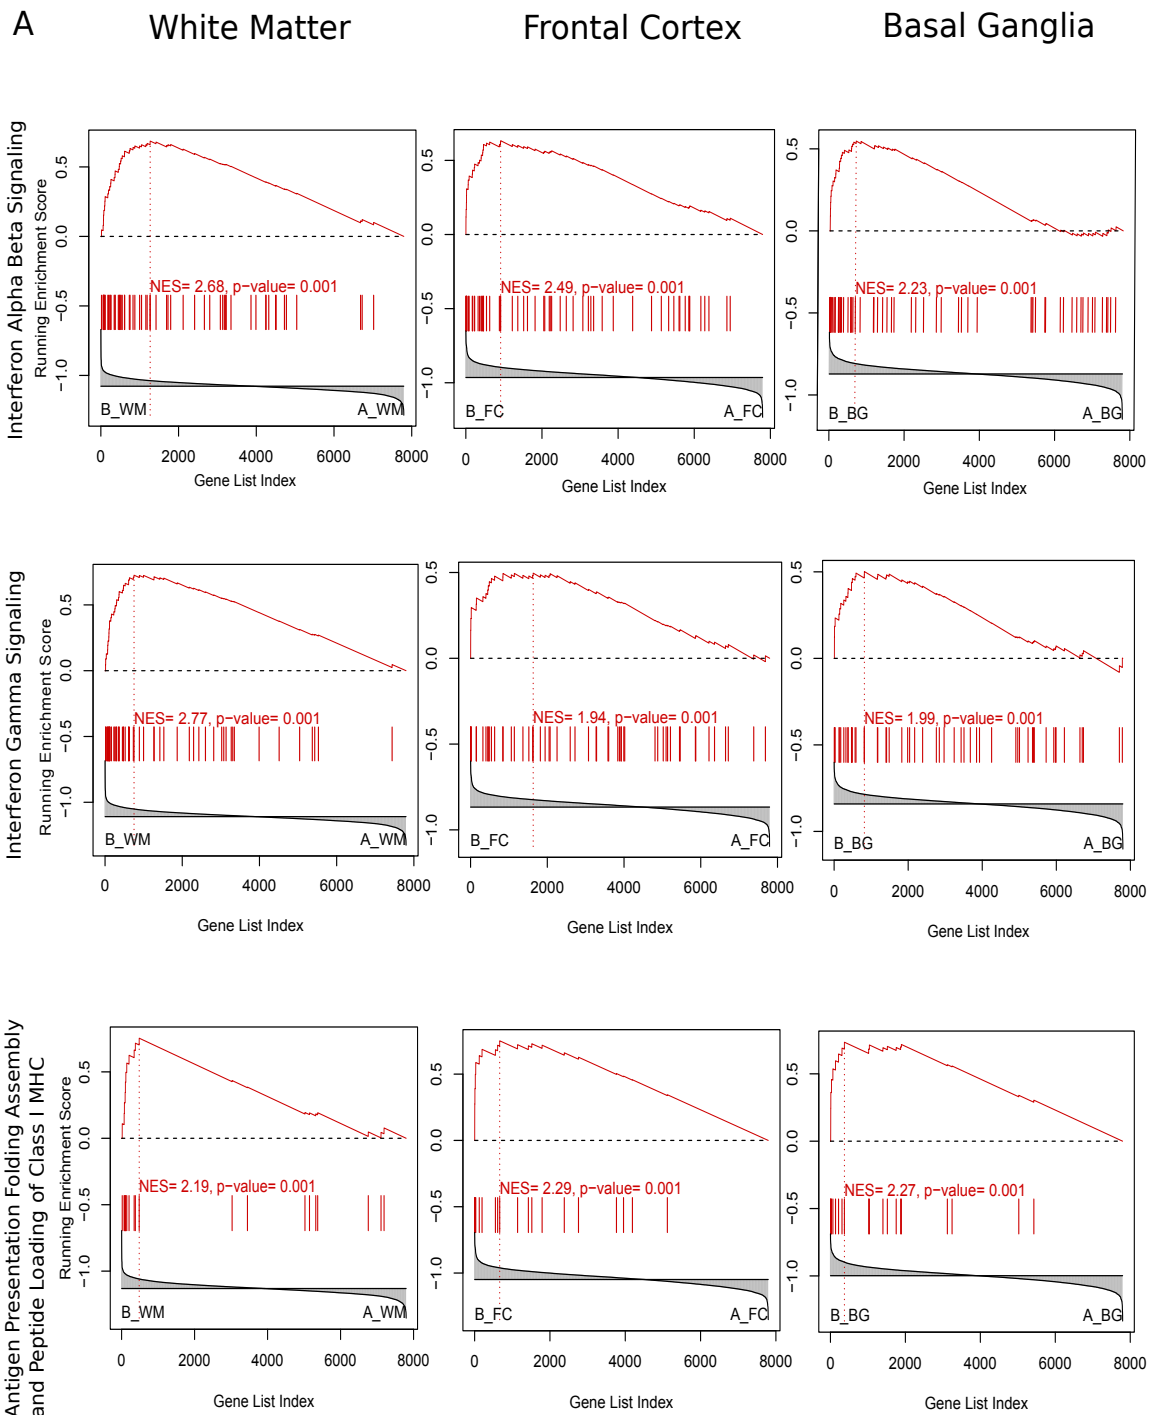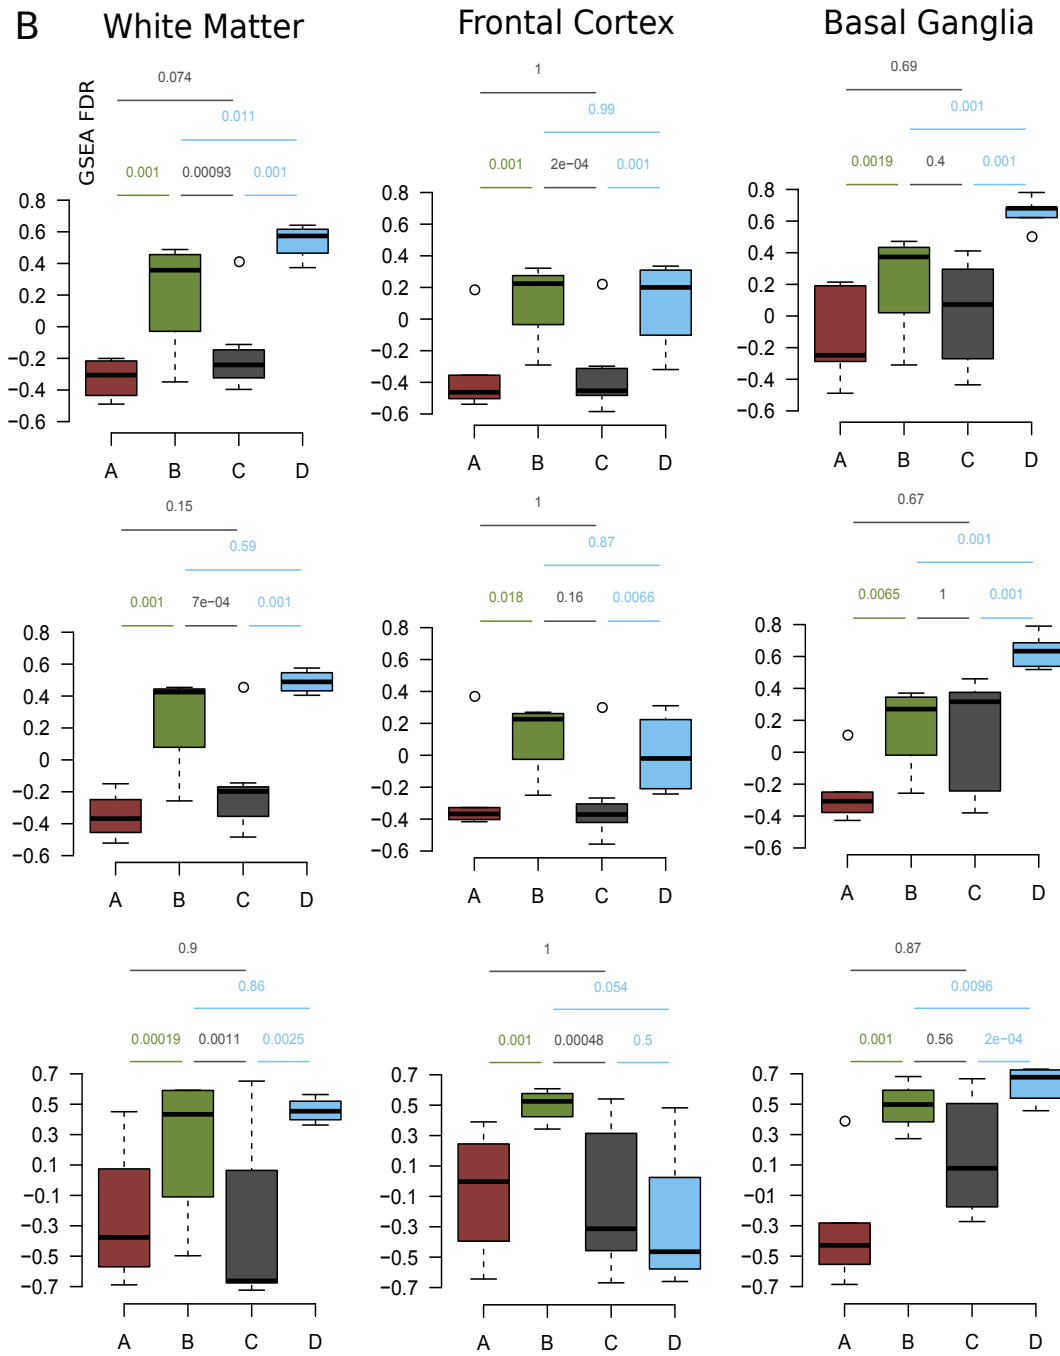



# Color Key

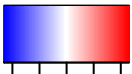

-4 0 4  
Row Z-Score

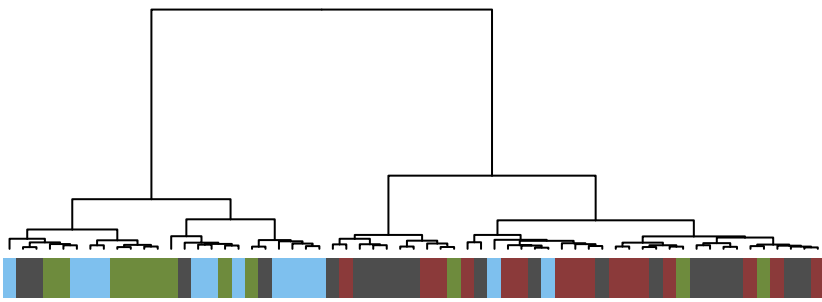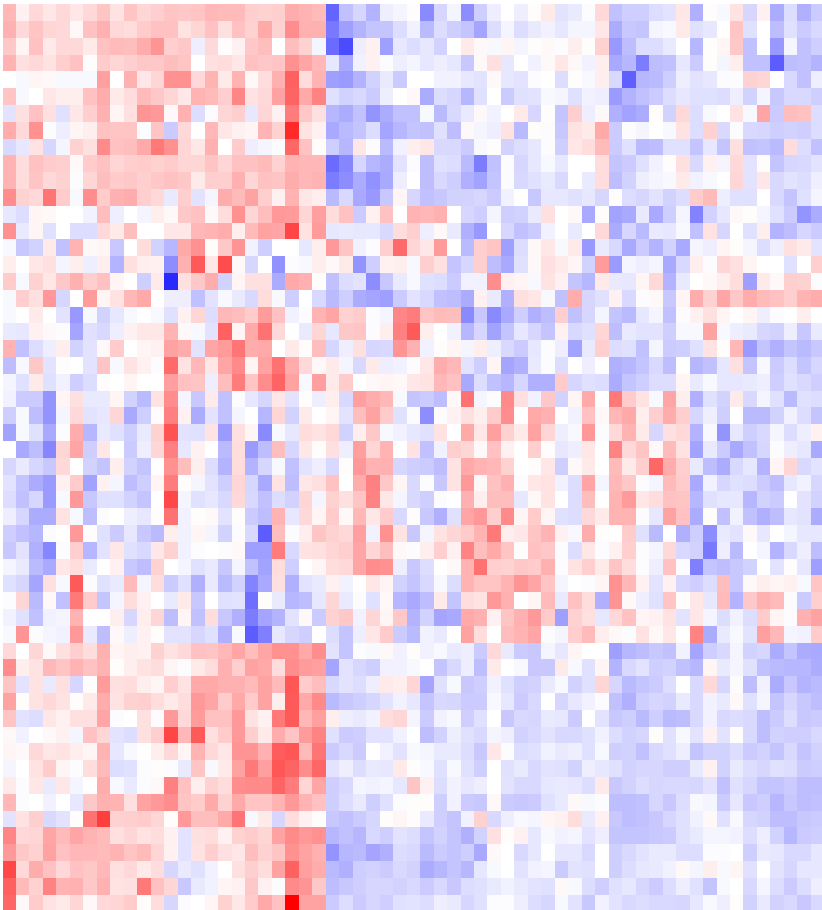

HLA-A  
HLA-C  
IFITM2  
IFITM1  
IRAK1  
TAP1  
SHC1  
MYD88  
IL1R1  
HLA-B  
HLA-G  
TAP2  
VPS37C  
PSME1  
VPS37B  
CTDP1  
FYN  
DCP2  
NUP133  
NUP107  
VCAM1  
IL6R  
EIF4E2  
LMAN1  
CLEC3A  
MMP13  
BMP1  
ADAMTS20  
ITIH4  
SERPINA2  
SERPINB4  
FZD9  
CCR4  
RHO  
VIPR2  
OPRD1  
GAST  
HTR5A  
DTX3L  
IRF9  
PSMB9  
PSMB8  
STAT1  
HLA-F  
IRF7  
XAF1  
SP100  
GBP1  
SOCS3  
ISG15  
IFIT3  
MX1  
IFI6  
IFI35

D.BG  
C.BG  
B.BG  
D.LC  
D.LC  
D.BG  
B.BG  
B.LC  
B.LC  
C.WM  
C.WM  
D.WM  
D.WM  
D.BG  
D.WM  
C.WM  
C.WM  
C.WM  
C.WM  
A.WM  
A.WM  
B.WM  
A.BG  
C.LC  
D.LC  
A.BG  
A.BG  
C.LC  
C.LC  
A.WM  
A.LC  
A.LC  
A.BG  
C.BG  
A.BG  
C.LC  
C.LC  
C.BG  
C.BG  
A.LC  
A.LC  
B.LC  
C.LC  
C.LC  
A.LC

### Frontal Cortex

### Basal Ganglia

bioRxiv preprint doi: <https://doi.org/10.1101/096172>; this version posted December 23, 2016. The copyright holder for this preprint (which was not certified by peer review) is the author/funder, who has granted bioRxiv a license to display the preprint in perpetuity. It is made available under aCC-BY-NC-ND 4.0 International license.

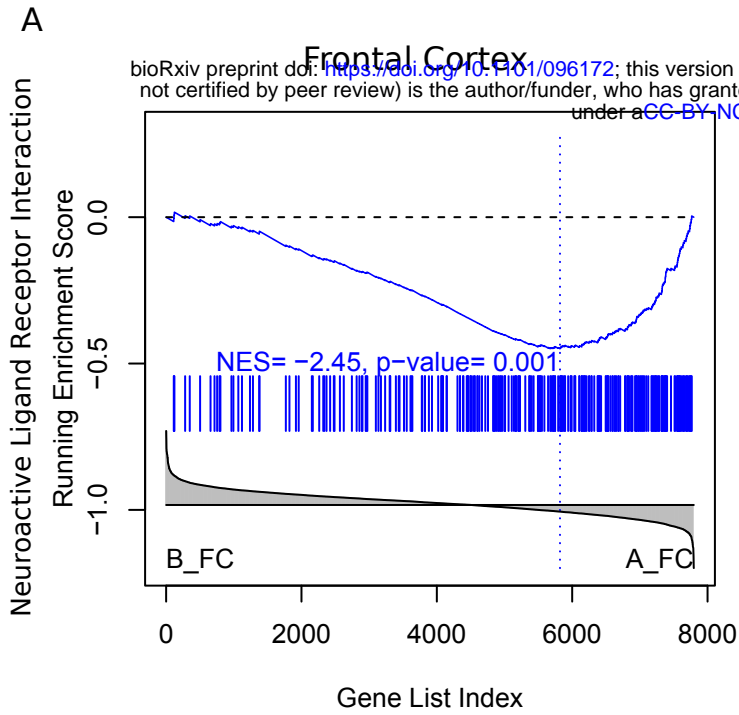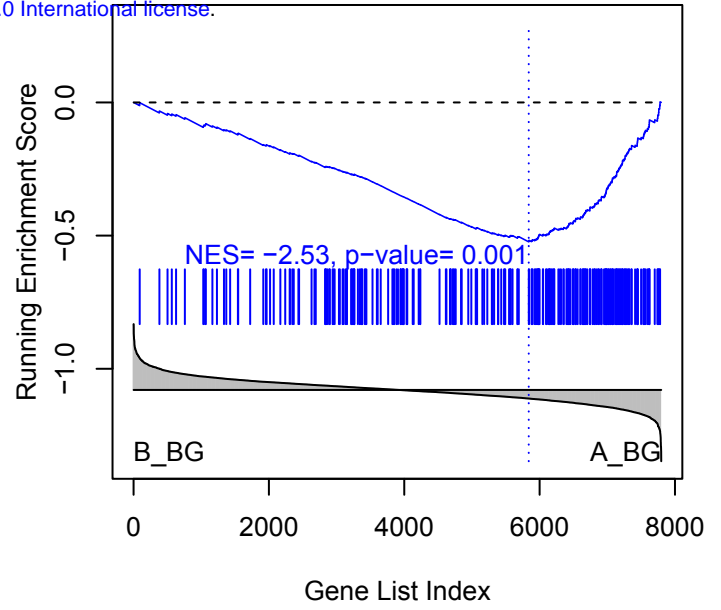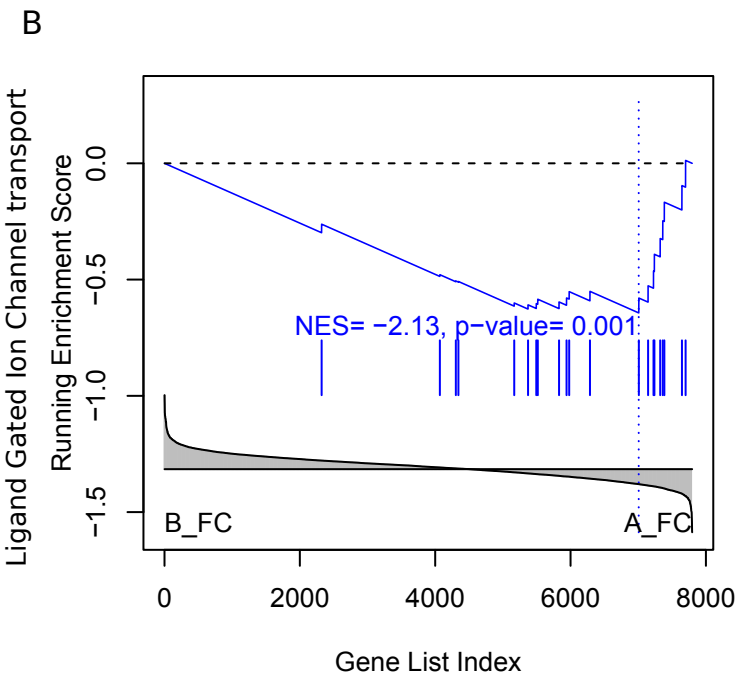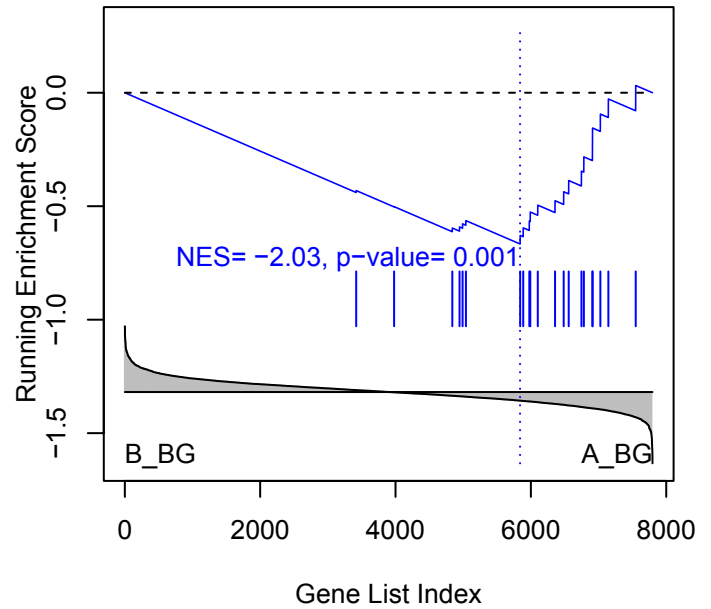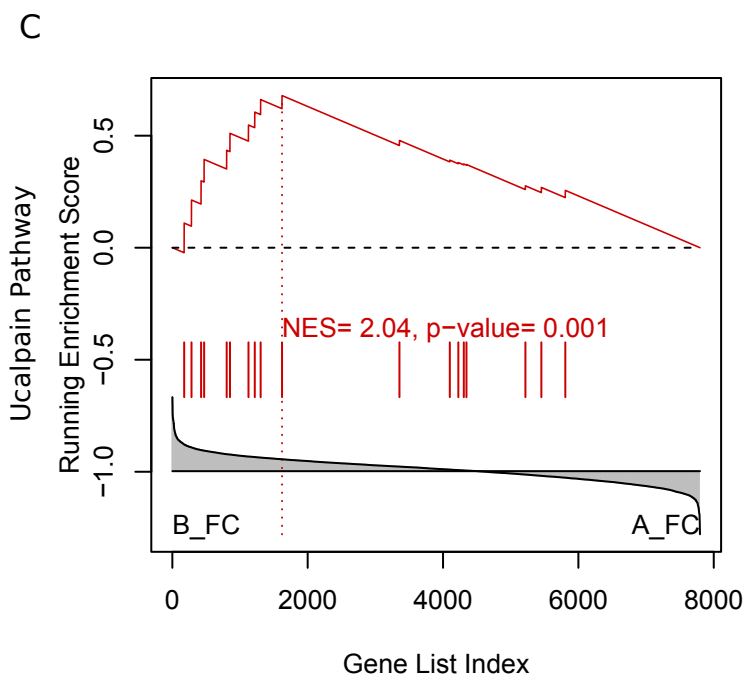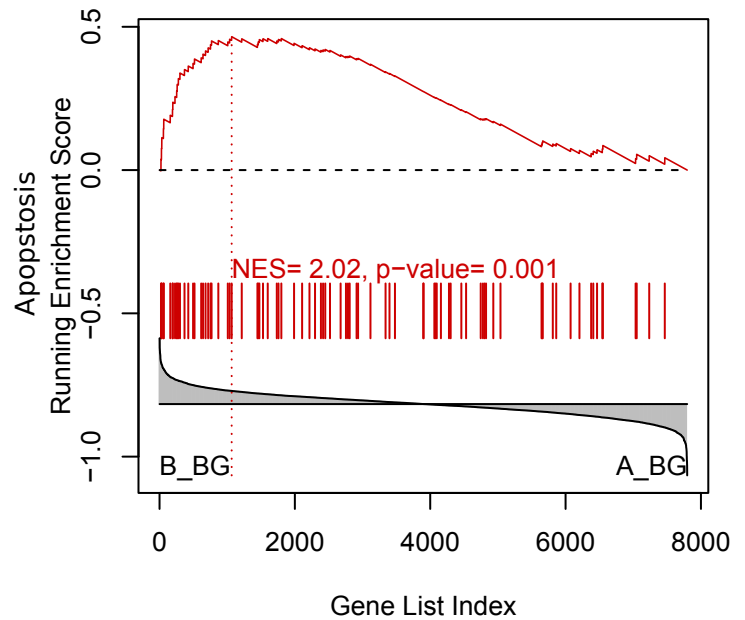

KEGG\_CYTOKINE\_CYTOKINE\_RECEPTOR\_INTERACTION

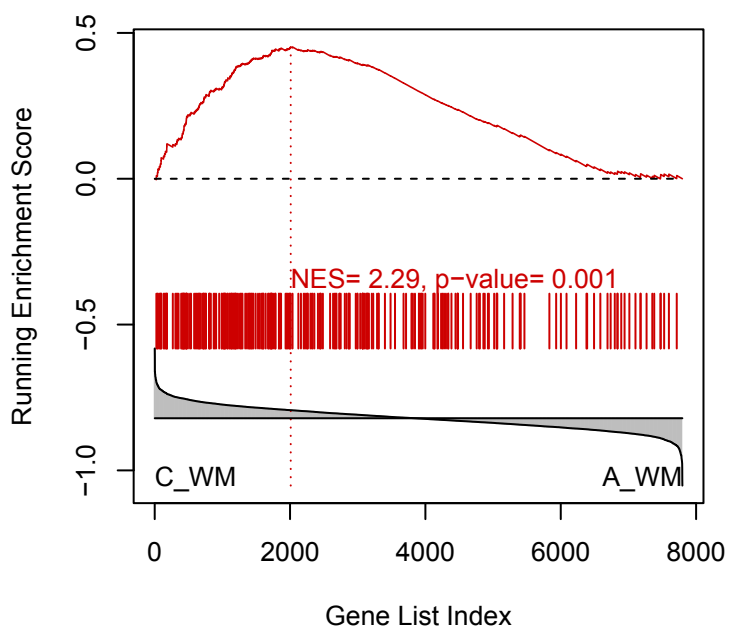

BIOCARTA\_CYTOKINE\_PATHWAY

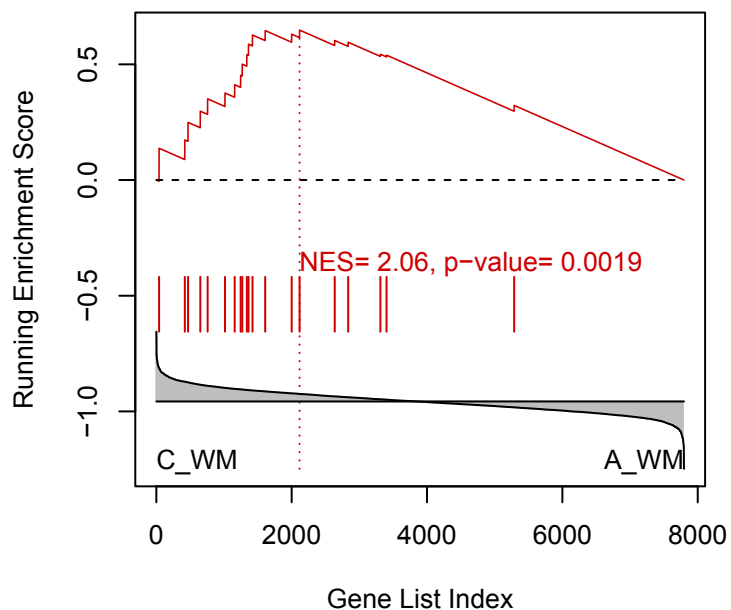

REACTOME\_BETA\_DEFENSINS

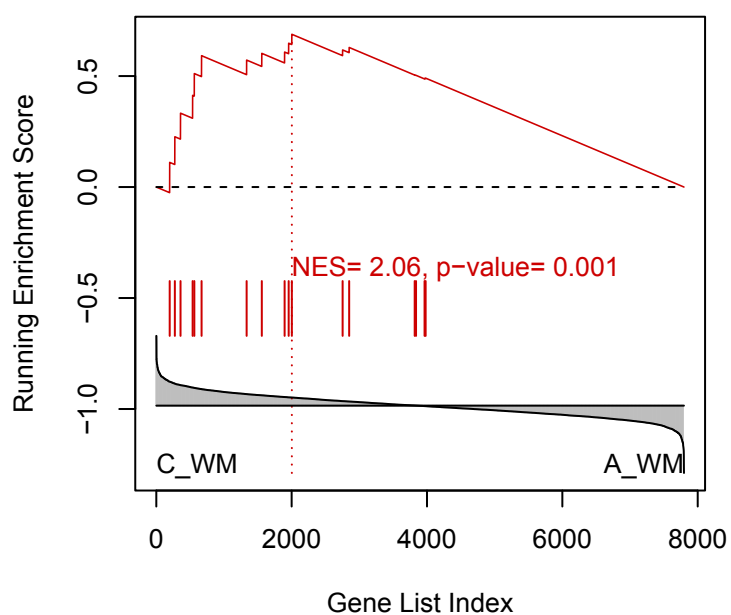

REACTOME\_CHEMOKINE\_RECEPTORS\_BIND\_CHEMOKINES

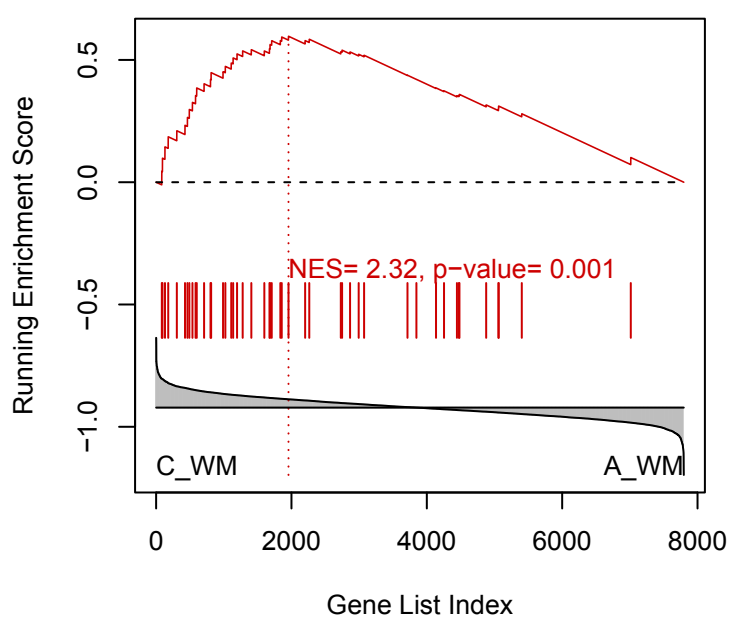

A

Huntington's disease pathway

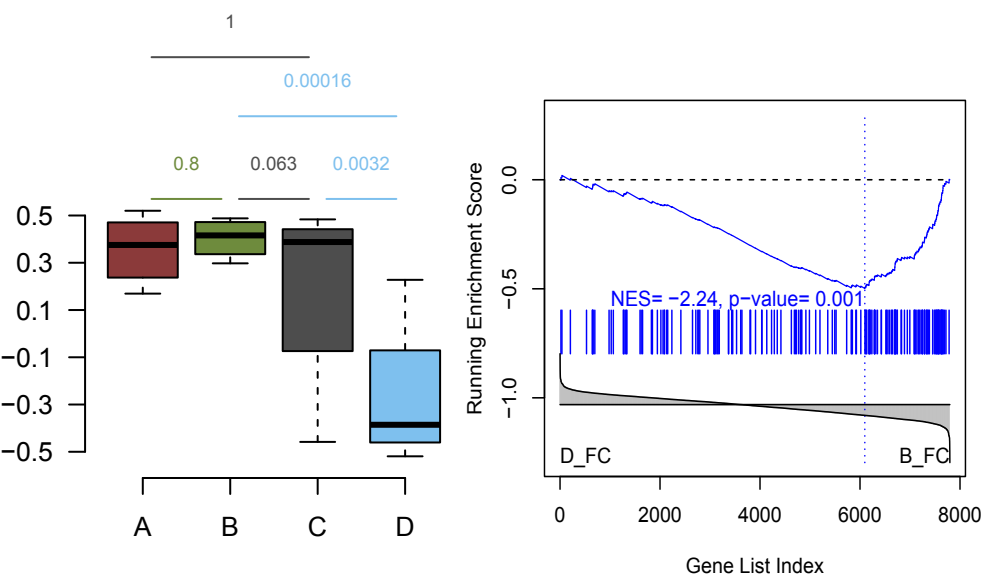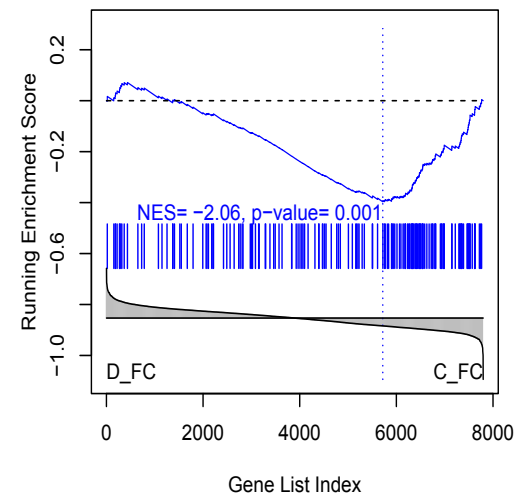

B

Parkinson's disease pathway

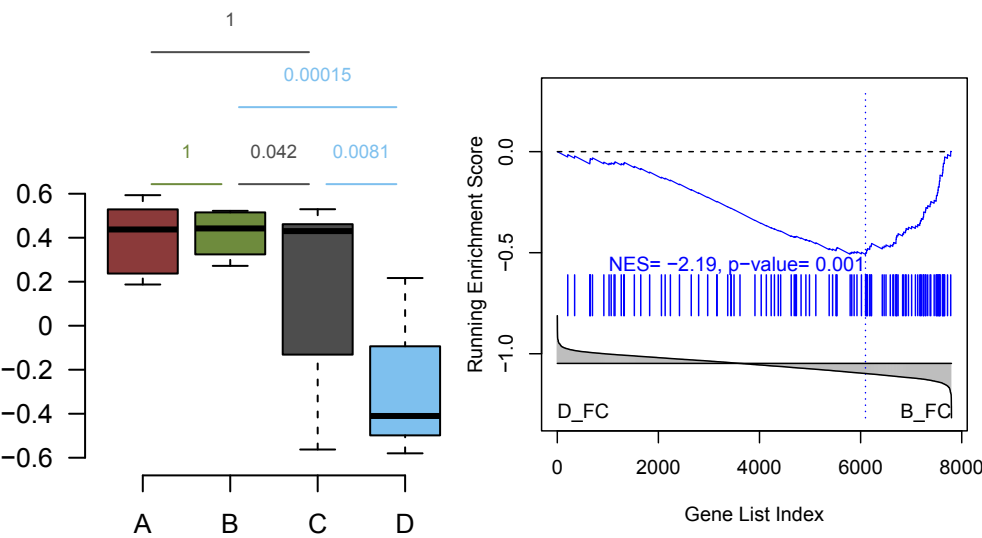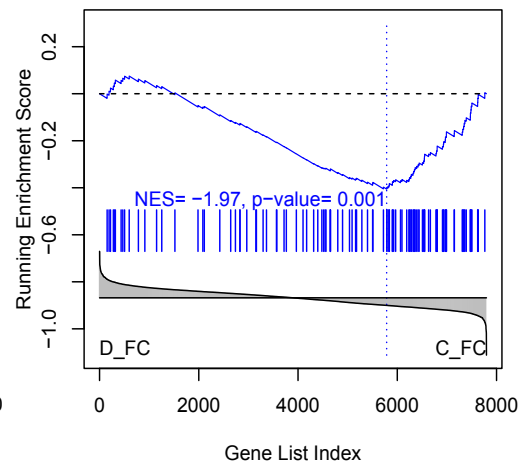

C

Neuronal System pathway

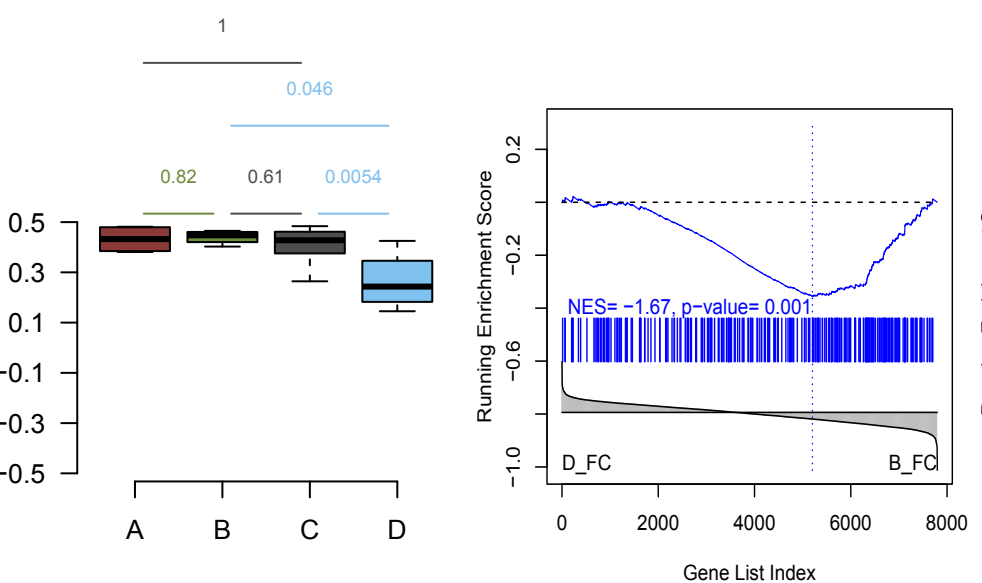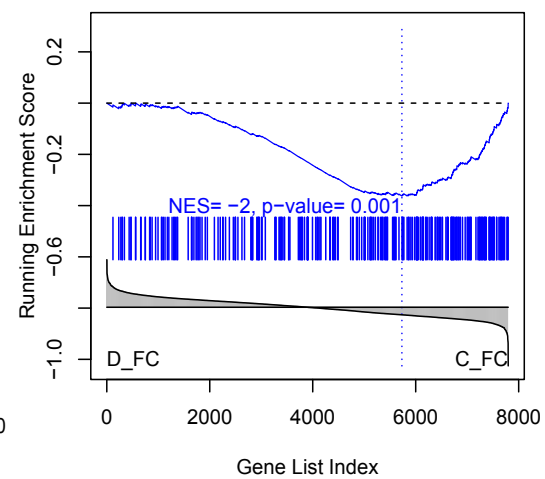

Source: https://www.biorxiv.org/content/10.1101/096172v1.full.pdf
